# Supplementary material
Source: publisher site journal article supplement (https://www.dovepress.com/article/475807)
Supplement: Supplementary file 1 [file get_supplementary_file.php]

# SUPPLEMENT

## Matching process

In order to create a comparison group and balance key predictors between the identified comparison group and the treatment group, we undertook a two-stage matching process. The first anchored potential matches from the broad potential comparison pool to treatment observations in time and selected matches based on granular historical characteristics. The second conducted propensity score matching (PSM) across this selected pool and the treatment group to refine matching and produce weights to balance the groups as well as possible.

For stage one, we focused on broad measures of later need for MOUD. On a monthly basis, we compiled a flag indicating the individual (treated or potential comparison group) was observed with any of the following: an OUD diagnosis in a medical encounter, a broad OUD flag in RDA data, an opioid poisoning diagnosis in a medical encounter, or any MOUD receipt. Using all available data, stage one matching would match on the number of months with this need flag and the months since the last such month. In the treatment group, 670 of the 813 enrolled and matched to state data had any such flag ever. The other 143 had no indication in state data of needing buprenorphine prior to enrolling in CBMF.

In order to exclude people from the comparison group who had enrolled in CBMF but not consented to the evaluation, and otherwise reduce treatment spillover, we dropped from the comparison pool those who had a prescription associated with a CBMF provider (via the DEA registration number in pharmacy records) while the program was in operation. Individuals deceased before CBMF began were also dropped from the pool.

Stage one matching proceeded as an iterative process. For each enrolled treatment group member (n=670), we assigned all comparison pool members a “start date” matching that of the treatment observation. We first selected from the pool on county of residence during the start month, using a logical list of matching counties for each county of residence of a treatment observation. Then we selected those pool members alive in the prior month. Within this winnowed pool, we calculated our total months with and months since last observed monthly need flag and selected those within 30% of the treatment observation’s values. For example, if the index individual had 10 months with the need flag including the enrollment month (before actual enrollment), we selected comparison group members with 7 to 13 months of need flags including the assigned start month.

Initial matching attempts with a window of 20% and without replacement (dropping comparison pool individuals once matched) proved unsuccessful in finding sufficient matches for numerous treatment group members. We adjusted the window to 30% and switched to matching with replacement. The maximum number of matches was set to 15, randomly selected from all matches, which occurred for most treatment group members. Stage one matching created a group of 10,021 comparison observations (an average of 14.96 per treatment group observation) comprised of 8,350 unique individuals.

In stage two matching and weighting, PSM used finer characteristics in a common 24-month period plus sex (binary, as recorded in state records) and age (as of the start month) to weight the sample to create balance across all the predictors. Our propensity score was estimated using logistic regression on treatment status. Predictors included:

- months of Medicaid eligibility in last 24
- number of opioid poisonings
- months with a poisoning
- number of OUD/poisoning-related ED visits
- number of OUD/poisoning-related inpatient visits
- months with any buprenorphine
- months with any naltrexone
- months with any methadone
- months with any MOUD
- months with any inpatient hospitalizations, all cause
- months with any ED visits, all-cause
- months with any arrest recorded
- female versus male, per RDA
- age in start month, per RDA

PSM was conducted using the MatchIt package for R (Ho, Imai, King, & Stuart, 2011). We selected from among three matching methodologies, all with variable matching ratios, without replacement, and with common support requirements: 1) nearest neighbor, 2) optimal pair, and 3) optimal full. We tried three functional forms for the distance measure: 1) linear, 2) squaring all numeric variables, and 3) interacting all numeric variables, including square terms, with the one categorical variable, sex. Nearest neighbor and the similar optimal pair matching were conducted with an average 4:1 match, broadened to 10:1, which tended to reduce matching performance as measured by standardized mean group differences, variance ratio, mean and maximum difference between treatment and comparison empirical cumulative distribution functions, and average standardized pair difference. Our selected solution, optimal full matching with a linear function, was superior on most performance criteria, and close to the best on the others, while also retaining the highest number of treatment (n=664) and comparison group (n=9,893) members. Standardized mean differences for each predictor after matching were less than 0.06.
